# Supplementary material
Source: publisher figshare collection journal article supplement (https://sage.figshare.com/ndownloader/files/31034495)
Supplement: Supplementary file 1 [file 31034495]

| filename | description |
| --- | --- |
| Dataset_2.sav | Data in SPSS format. All variables and measurements are labeled. |
| Dataset_2.csv | Data in CSV format. This file is for running the Mplus program. |
| LCGA_unconditional_mother.pdf | This is the output from Mplus program. The syntax is shown on the top of the first page. This file contained the syntax and output of an unconditional model with three classes of the mother sample. |
| LCGA_conditional_mother.pdf | This is the output from Mplus program. The syntax is shown on the top of the first page. This file contained the syntax and output of a conditional model, which was estimated by adding covariates into the model estimation, for mother sample. |
